# Supplementary material for: I Choose You: Selecting Accurate Reference Genes for qPCR Expression Analysis in Reproductive Tissues in Arabidopsis thaliana
Source: MDPI journal article supplement (doi:10.3390/biom13030463), 2023-03-02
Supplement: s1 [file s1]

# Supplemental Information

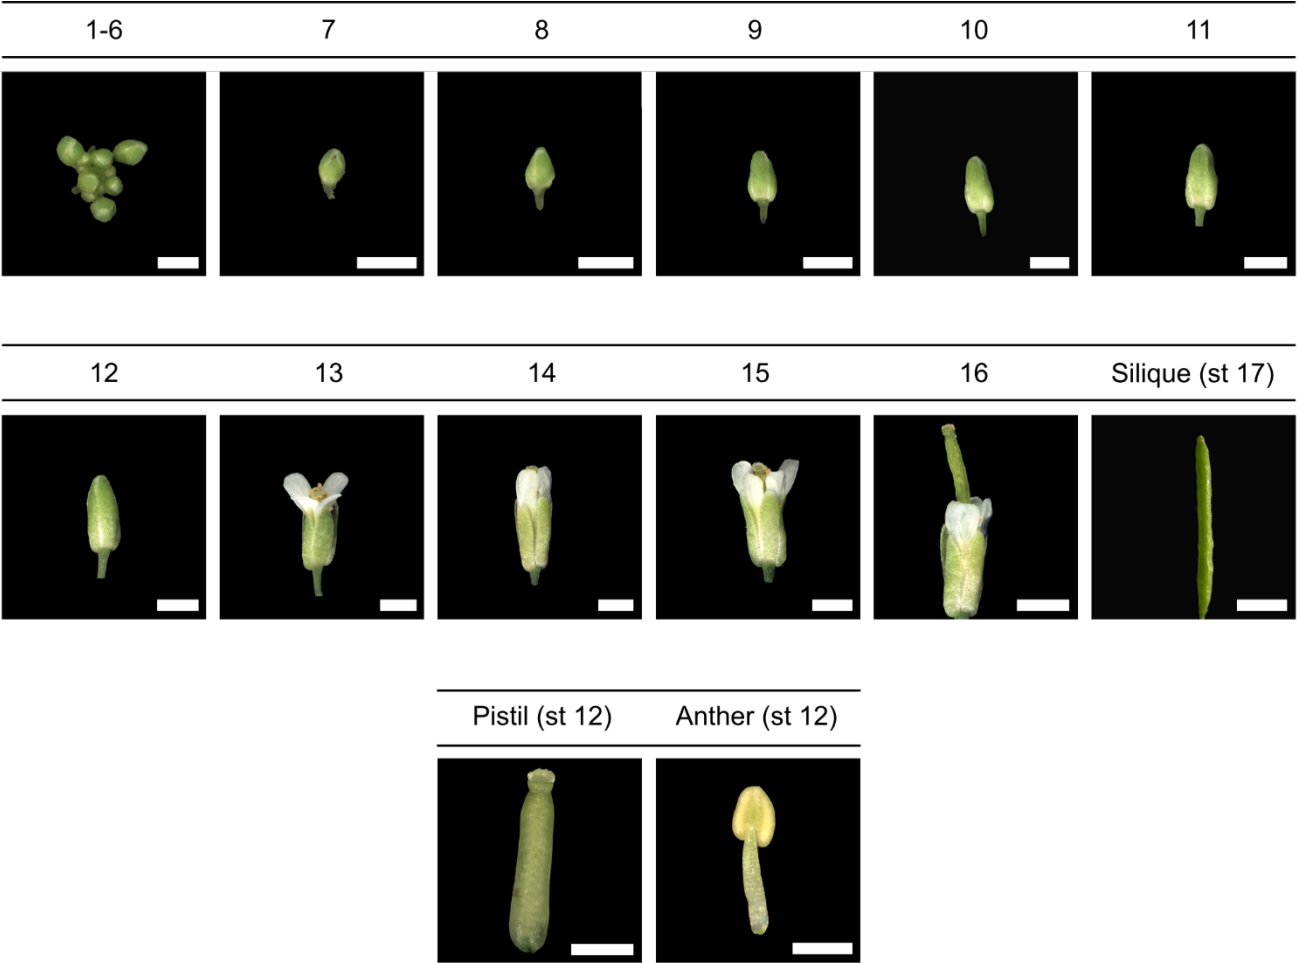

**Figure S1.** Stages of flower development and tissues of *A. thaliana* used in this study. Images representing the developmental stages and tissues of *A. thaliana* flowers according to [38]. All images were obtained with a stereo microscope. Scale bars: 5 mm [Silique (st 17)], 1 mm (st 1-16) and 0.5 mm [Anther (st 12) and Pistil (st 12)]. Abbreviations: st, stage.

*UBC9*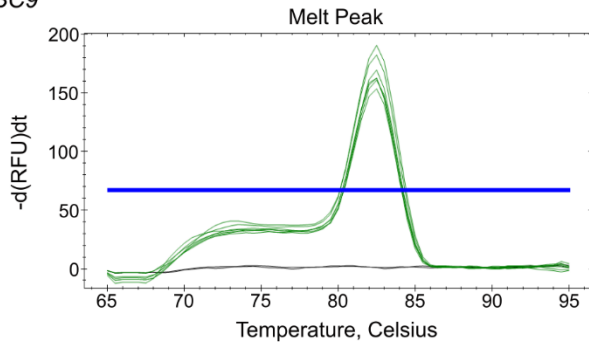*ACT7*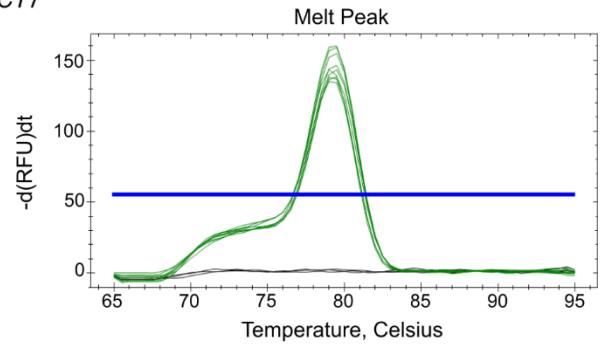*GAPC-2*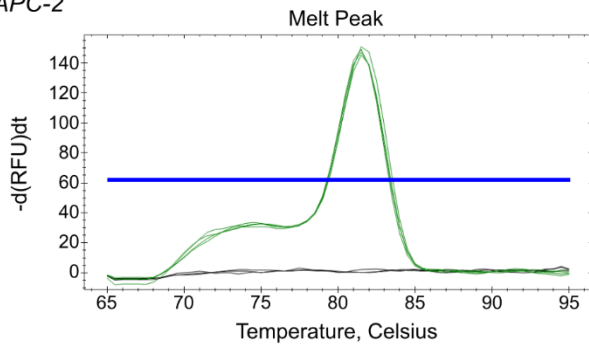*RCE1*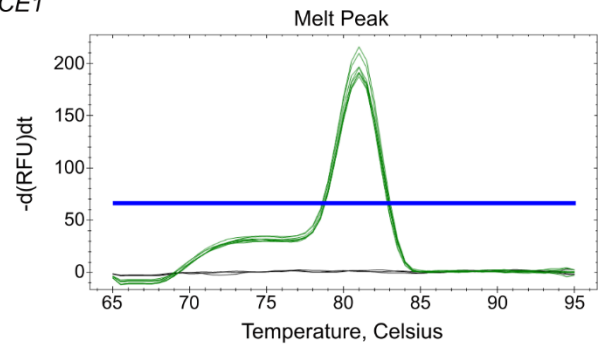*PP2AA3*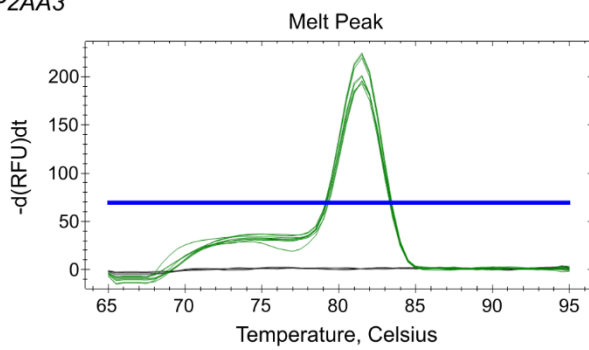*TUA2*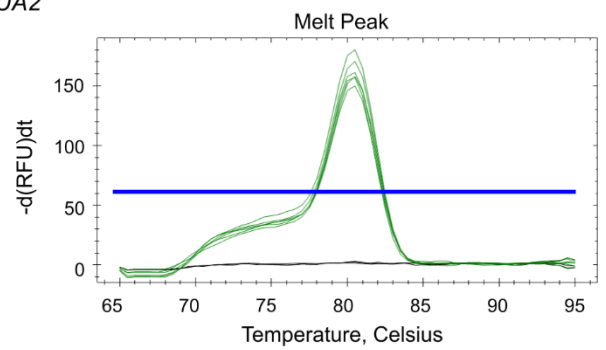*SAC52*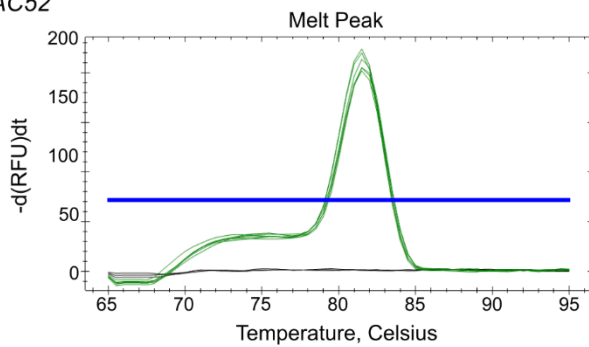*YLS8*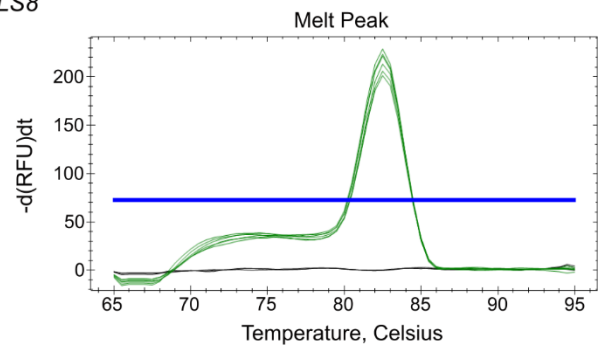*SAMDC*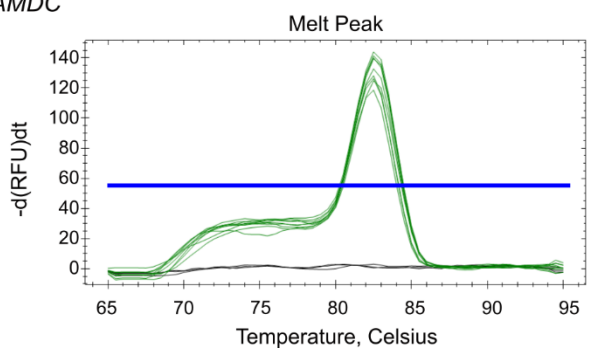*HIS3.3*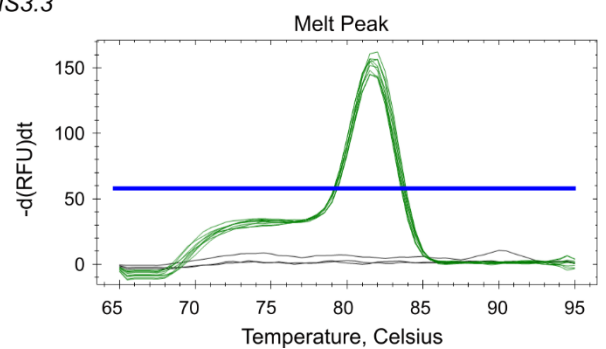

**Figure S2.** Melt curves of ten candidate reference genes (*UBC9*, *ACT7*, *GAPC-2*, *RCE1*, *PP2AA3*, *TUA2*, *SAC52*, *YLS8*, *SAMDC* and *HIS3.3*) showing the specificity of qPCR amplification. Green lines are the melt curves of each sample tested, black lines are the melt curves of NTCs and the horizontal blue lines represent the baseline thresholds.

**Table S1.** Expression values on EVOREPRO (<https://evorepro.sbs.ntu.edu.sg/>) [33]. Expression values are presented as transcripts per million (TPM) on four different types of tissues defined by [33]: male (microspore, bicellular pollen, tricellular pollen, mature pollen, pollen tube, generative cell and sperm cell), female (ovary, ovule and egg cell), flower (carpels, stigmatic tissue, stamen filaments, anthers, petals, sepals, flower buds and receptacles) and seeds (endosperm, young seed, seed and germinating seed).

| Gene Symbol   | EVOREPRO - TPM |        |        |         |
|---------------|----------------|--------|--------|---------|
|               | Male           | Female | Flower | Seed    |
| <i>UBC9</i>   | 117.82         | 229.75 | 225.95 | 109.95  |
| <i>ACT7</i>   | 60.75          | 467.27 | 595.82 | 326.93  |
| <i>GAPC2</i>  | 397.10         | 353.65 | 565.74 | 344.34  |
| <i>RCE1</i>   | 61.63          | 91.96  | 114.17 | 81.26   |
| <i>YLS8</i>   | 112.85         | 428.76 | 266.24 | 326.73  |
| <i>TUA2</i>   | 329.40         | 364.31 | 306.89 | 288.50  |
| <i>PP2AA3</i> | 31.23          | 55.18  | 36.57  | 36.31   |
| <i>SAC52</i>  | 680.44         | 882.82 | 820.79 | 1072.44 |
| <i>SAMDC</i>  | 839.40         | 707.57 | 741.30 | 477.41  |
| <i>HIS3.3</i> | 101.10         | 545.44 | 471.98 | 397.63  |

**Table S2.** List of target genes and primer sequences used to validate the reference genes.

| Locus            | Gene Symbol   | Gene Name                         | Primer Sequences                                | Amplicon length (bp) |
|------------------|---------------|-----------------------------------|-------------------------------------------------|----------------------|
|                  |               |                                   | Forward and Reverse (5' - 3')                   |                      |
| <i>AT5G14380</i> | <i>AGP6</i>   | <i>Arabinogalactan protein 6</i>  | TTCTAAGTTAAGTCGTCCAC<br>GACATTTAGGTTTATATTACTCC | 135                  |
| <i>AT3G01700</i> | <i>AGP11</i>  | <i>Arabinogalactan protein 11</i> | CCACGACTAATGTGAAGC<br>CAACAGGGGATGATGCTTTC      | 206                  |
| <i>AT5G10430</i> | <i>JAGGER</i> | <i>Arabinogalactan protein 4</i>  | TCGCCACTTCAGCACTCGCTC<br>CGGGAGCACTGCTTGGGCTC   | 261                  |

**Table S3.** List of the most stable reference genes for each set and subset of samples according to geNorm, NormFinder, BestKeeper,  $\Delta$ Ct method and RefFinder.

| Most Stable                         |                       |                          |                                                            |                                                          |                                                        |                          |                               |                                       |
|-------------------------------------|-----------------------|--------------------------|------------------------------------------------------------|----------------------------------------------------------|--------------------------------------------------------|--------------------------|-------------------------------|---------------------------------------|
|                                     | Flower<br>development | Flower<br>(st 1-16)      | Silique<br>(st 17)                                         | Pistil<br>(st 12)                                        | Anther<br>(st 12)                                      | Genotype                 | wt Col-0 vs.<br><i>jagger</i> | wt No-0 vs.<br><i>agp6agp11</i>       |
| <b>geNorm</b>                       | <i>TUA2 / RCE1</i>    | <i>YLS8 /<br/>PP2AA3</i> | <i>TUA2 / YLS8<br/>/ PP2AA3 /<br/>SAC52 /<br/>HIS3.3 /</i> | <i>TUA2 /<br/>RCE1 / YLS8<br/>/ HIS3.3</i>               | <i>TUA2 /<br/>RCE1 / UBC9<br/>/ YLS8 /<br/>SAC52 /</i> | <i>HIS3.3 /<br/>ACT7</i> | <i>HIS3.3 /<br/>SAMDC</i>     | <i>HIS3.3 /<br/>YLS8 /<br/>GAPC-2</i> |
| <b>NormFinder</b>                   | <i>RCE1</i>           | <i>YLS8</i>              | <i>SAC52 /<br/>YLS8 / TUA2<br/>/ ACT7 /<br/>HIS3.3 /</i>   | <i>RCE1 /<br/>SAC52 /<br/>YLS8 / TUA2<br/>/ HIS3.3 /</i> | <i>RCE1 /<br/>SAC52 /<br/>YLS8 / TUA2<br/>/ ACT7 /</i> | <i>YLS8</i>              | <i>HIS3.3 /<br/>SAMDC</i>     | <i>HIS3.3 /<br/>YLS8 /<br/>GAPC-2</i> |
| <b>BestKeeper</b>                   | <i>UBC9</i>           | <i>GAPC-2</i>            | <i>UBC9 / RCE1</i>                                         | <i>UBC9</i>                                              | <i>UBC9 / RCE1<br/>/ TUA2 /<br/>SAC52 /<br/>YLS8 /</i> | <i>UBC9</i>              | <i>UBC9</i>                   | <i>YLS8 /<br/>GAPC-2 /<br/>HIS3.3</i> |
| <b><math>\Delta</math>Ct method</b> | <i>RCE1</i>           | <i>YLS8</i>              | <i>YLS8 /<br/>SAC52 /<br/>TUA2 /<br/>HIS3.3 /</i>          | <i>YLS8 /<br/>SAC52 /<br/>TUA2 /<br/>HIS3.3 /</i>        | <i>YLS8 /<br/>SAC52 /<br/>TUA2 /<br/>RCE1 /</i>        | <i>YLS8</i>              | <i>HIS3.3 /<br/>SAMDC</i>     | <i>YLS8 /<br/>GAPC-2 /<br/>HIS3.3</i> |
| <b>RefFinder</b>                    | <i>RCE1</i>           | <i>YLS8</i>              | <i>TUA2</i>                                                | <i>RCE1</i>                                              | <i>UBC9</i>                                            | <i>YLS8</i>              | <i>HIS3.3</i>                 | <i>YLS8</i>                           |
